# Supplementary material
Source: PubMed Central journal article supplement (PMC6218861)

## Supplemental Data

# Dickkopf-3 (DKK3) in urine identifies patients with short-term risk of eGFR loss

### Table of contents

|                          |            |
|--------------------------|------------|
| Supplemental Tables 1–19 | Page 2–21  |
| Supplemental Figures 1–3 | Page 22–24 |

### Supplemental Table 1

Baseline characteristics of the I LIKE HOME participants.

|                                      | <b>All participants<br/>(N=481)</b> |
|--------------------------------------|-------------------------------------|
| Age (years)                          | 48.3±8.3                            |
| Gender (% male)                      | 32.7                                |
| Body mass index (kg/m <sup>2</sup> ) | 26.2±4.6                            |
| Systolic blood pressure (mmHg)       | 136±18                              |
| Diastolic blood pressure (mmHg)      | 88±11                               |
| Smoking (%)                          | 26.5                                |
| Diabetes (%)                         | 4.8                                 |
| Plasma creatinine (mg/dL)            | 0.8±0.1                             |
| eGFR (ml/min/1.73 m <sup>2</sup> )   | 93±13                               |
| Urine DKK3/creatinine (pg/mg)        | 33 (126)                            |
| Log urine DKK3/creatinine (pg/mg)    | 3.8±1.7                             |
| Albuminuria (mg/g)                   | 4.2 (3.0)                           |
| Log albuminuria (mg/g)               | 1.6±0.6                             |
| Serum C-reactive protein (mg/L)      | 1.5 (2.2)                           |
| Log serum C-reactive protein (mg/L)  | 0.4±1.0                             |

eGFR, estimated glomerular filtration rate

**Supplemental Table 2**

Causes of chronic kidney diseases (CKD) in participants of the CARE FOR HOME study.

| <b>Cause of CKD</b>                 | <b>N</b> |
|-------------------------------------|----------|
| CKD after acute kidney injury       | 8        |
| Congenital kidney diseases          | 9        |
| Cardiorenal syndrome                | 13       |
| Cystic kidney diseases              | 23       |
| Tubulointerstitial diseases         | 35       |
| Glomerular diseases                 | 79       |
| Diabetic nephropathy                | 80       |
| Diabetic/hypertensive kidney injury | 104      |
| Hypertensive/vascular diseases      | 202      |
| Other                               | 22       |

### Supplemental Table 3

Baseline characteristics of the CARE FOR HOME participants according to categories of urinary DKK3/creatinine concentrations.

|                                      | All participants<br>(N=575) | DKK3/creatinine<br>≤200 pg/mg<br>(N=167) | DKK3/creatinine<br>201-1,000 pg/mg<br>(N=213) | DKK3/creatinine<br>1,001-4,000 pg/mg<br>(N=126) | DKK3/creatinine<br>>4,000 pg/mg<br>(N=69) | <i>P</i> |
|--------------------------------------|-----------------------------|------------------------------------------|-----------------------------------------------|-------------------------------------------------|-------------------------------------------|----------|
| Age (years)                          | 65.5±12.1                   | 64.2±12.3                                | 65.6±11.4                                     | 65.9±12.7                                       | 66.2±14.0                                 | 0.583    |
| Gender (% male)                      | 41.3                        | 43.0                                     | 49.8                                          | 30.3                                            | 30.8                                      | 0.002    |
| Body mass index (kg/m <sup>2</sup> ) | 30.4±5.5                    | 31.2±6.0                                 | 30.1±5.2                                      | 30.6±5.6                                        | 28.9±4.9                                  | 0.035    |
| Systolic blood pressure (mmHg)       | 152±24                      | 150±25                                   | 152±23                                        | 152±22                                          | 159±26                                    | 0.094    |
| Diastolic blood pressure (mmHg)      | 85±13                       | 85±12                                    | 85±12                                         | 86±13                                           | 86±14                                     | 0.614    |
| Smoking (%)                          | 10.5                        | 11.4                                     | 7.5                                           | 13.4                                            | 12.3                                      | 0.330    |
| ACE inhibitor (%)                    | 35.6                        | 33.4                                     | 37.6                                          | 40.8                                            | 34.7                                      | 0.032    |
| AT1 receptor blocker (%)             | 50.5                        | 56.6                                     | 49.1                                          | 49.2                                            | 53.1                                      | 0.007    |
| Diabetes (%)                         | 39.2                        | 33.5                                     | 42.8                                          | 38.7                                            | 43.1                                      | 0.304    |
| Plasma creatinine (mg/dL)            | 1.6±0.6                     | 1.4±0.4                                  | 1.4±0.5                                       | 1.7±0.5                                         | 2.3±0.8                                   | <0.001   |
| eGFR (ml/min/1.73 m <sup>2</sup> )   | 48.6±18.3                   | 53.6±15.8                                | 52.4±17.8                                     | 44.4±16.7                                       | 32.1±17.1                                 | <0.001   |
| Urine DKK3/creatinine (pg/mg)        | 431 (1,388)                 | 95 (87)                                  | 388 (339)                                     | 1,721 (1,207)                                   | 7,738 (10,422)                            | <0.001   |
| Log urine DKK3/creatinine (pg/mg)    | 6.1±1.7                     | 4.3±0.8                                  | 6.0±0.5                                       | 7.5±0.4                                         | 9.2±0.7                                   | <0.001   |
| Albuminuria (mg/g)                   | 322 (1,930)                 | 115 (390)                                | 272 (1,140)                                   | 1,089 (3,620)                                   | 3,702 (17,650)                            | <0.001   |
| Log albuminuria (mg/g)               | 3.8±1.9                     | 3.1±1.6                                  | 3.6±1.8                                       | 4.4±1.8                                         | 5.7±1.9                                   | <0.001   |
| Serum C-reactive protein (mg/L)      | 2.7 (4.0)                   | 2.4 (4.3)                                | 2.7 (3.7)                                     | 2.9 (6.4)                                       | 2.5 (2.9)                                 | 0.476    |
| Log serum C-reactive protein (mg/L)  | 0.9±1.1                     | 0.9±1.0                                  | 0.9±1.0                                       | 0.9±1.0                                         | 0.9±1.0                                   | 0.476    |

eGFR, estimated glomerular filtration rate

**Supplemental Table 4**

Multivariate adjusted means of DKK3/creatinine in urine in the general population (I LIKE HOME study) and in CKD patients (CARE FOR HOME study). Adjusted for age, gender, estimated glomerular filtration rate, presence of diabetes, systolic blood pressure, smoking, body mass index and albuminuria.

| <b>Urinary DKK3 (pg/mg)</b>                                 |            |                                                         |            |          |
|-------------------------------------------------------------|------------|---------------------------------------------------------|------------|----------|
| <b>General population<br/>I LIKE HOME study<br/>(N=481)</b> |            | <b>CKD patients<br/>CARE FOR HOME study<br/>(N=575)</b> |            |          |
| <b>Mean</b>                                                 | <b>SEM</b> | <b>Mean</b>                                             | <b>SEM</b> | <b>P</b> |
| 336.9                                                       | 375.8      | 2260.6                                                  | 343.8      | <0.0001  |

**Supplemental Table 5**

Bivariate correlations between urinary DKK3/creatinine and clinical parameters in subjects from the I LIKE HOME study.

| <b>Parameter</b>                                                  | <b>Correlation coefficient (<math>\rho</math>)</b> | <b><i>P</i></b> |
|-------------------------------------------------------------------|----------------------------------------------------|-----------------|
| Age (years)                                                       | 0.013                                              | 0.790           |
| Gender                                                            | 0.068                                              | 0.152           |
| Estimated glomerular filtration rate (ml/min/1.73m <sup>2</sup> ) | -0.200                                             | 0.677           |
| Log albuminuria (mg/g creatinine)                                 | 0.111                                              | 0.051           |
| Body mass index (kg/m <sup>2</sup> )                              | -0.003                                             | 0.954           |
| Diabetes                                                          | 0.045                                              | 0.341           |
| Systolic blood pressure (mmHg)                                    | 0.012                                              | 0.799           |
| Smoking                                                           | -0.073                                             | 0.157           |
| Log serum C-reactive protein (mg/l)                               | -0.038                                             | 0.432           |

$\rho$ , correlation coefficient

**Supplemental Table 6**

Bivariate correlations between urinary DKK3/creatinine and clinical parameters in subjects with CKD from the CARE FOR HOME study.

| <b>Parameter</b>                                                  | <b>Correlation coefficient (<math>\rho</math>)</b> | <b>P</b> |
|-------------------------------------------------------------------|----------------------------------------------------|----------|
| Age (years)                                                       | -0.016                                             | 0.391    |
| Gender                                                            | -0.046                                             | 0.016    |
| Estimated glomerular filtration rate (ml/min/1.73m <sup>2</sup> ) | -0.247                                             | <0.001   |
| Log albuminuria (mg/g creatinine)                                 | -0.258                                             | <0.001   |
| Body mass index (kg/m <sup>2</sup> )                              | -0.041                                             | 0.033    |
| Diabetes                                                          | 0.014                                              | 0.478    |
| Systolic blood pressure (mmHg)                                    | 0.021                                              | 0.272    |
| Smoking                                                           | -0.016                                             | 0.389    |
| Log serum C-reactive protein (mg/l)                               | -0.018                                             | 0.341    |

$\rho$ , correlation coefficient

**Supplemental Table 7**

Estimated marginal means of annual change of estimated glomerular filtration rate (eGFR) according to tertiles (1: ≤219 pg/mg; 2: 220-864 pg/mg; 3: >864 pg/mg) or quartiles (1: ≤155 pg/mg; 2: 156-405 pg/mg; 3: 406-1,329 pg/mg; 4: >1,329 pg/mg) of urinary DKK3/creatinine concentrations in participants of the CARE FOR HOME cohort.

| <b>Tertile of urinary DKK3/creatinine</b> | <b>Annual change of eGFR (%)</b> | <b>95 % CI</b> | <b><i>P</i></b> | <b>Quartile of urinary DKK3/creatinine</b> | <b>Annual change of eGFR (%)</b> | <b>95 % CI</b> | <b><i>P</i></b> |
|-------------------------------------------|----------------------------------|----------------|-----------------|--------------------------------------------|----------------------------------|----------------|-----------------|
| 1                                         | 0.8                              | -1.0 – 2.6     | Ref.            | 1                                          | 1.1                              | -1.0 – 3.1     | Ref.            |
| 2                                         | -2.0                             | -3.4 – -0.5    | 0.006           | 2                                          | -1.3                             | -3.2 – 0.5     | 0.045           |
| 3                                         | -3.5                             | -5.3 – -1.6    | <0.001          | 3                                          | -1.2                             | -3.0 – 0.6     | 0.067           |
|                                           |                                  |                |                 | 4                                          | -5.0                             | -7.1 – -2.9    | <0.001          |

Adjusted for age, gender, body mass index, systolic blood pressure, diabetes, smoking, eGFR, and log albuminuria



**Supplemental Table 8**

Estimated marginal means of annual change of estimated glomerular filtration rate (eGFR) according to categories of DKK3/creatinine concentrations in urine in participants of the CARE FOR HOME cohort according to therapy with ACE inhibitors or AT1 receptor blockers.

| Urinary DKK3/creatinine (pg/mg) | Annual change of eGFR (%)              | 95 % CI     | <i>P</i>  | Annual change of eGFR (%)           | 95 % CI      | <i>P</i>  |
|---------------------------------|----------------------------------------|-------------|-----------|-------------------------------------|--------------|-----------|
|                                 | <b>No ACE inhibitor therapy</b>        |             |           | <b>ACE inhibitor therapy</b>        |              |           |
| <b>≤ 200</b>                    | -0.3                                   | -2.7–2.0    | Reference | 2.2                                 | -1.2–5.6     | Reference |
| <b>201 – 1,000</b>              | -2.0                                   | -4.1–0.1    | 0.192     | -2.0                                | -5.2–1.3     | 0.281     |
| <b>1,001 – 4,000</b>            | -3.0                                   | -5.8– -0.2  | 0.099     | -3.3                                | -7.1–0.4     | 0.019     |
| <b>&gt; 4,000</b>               | -8.5                                   | -12.5– -4.4 | <0.001    | -11.6                               | -17.4– -5.8  | 0.008     |
|                                 | <b>No AT1 receptor blocker therapy</b> |             |           | <b>AT1 receptor blocker therapy</b> |              |           |
| <b>≤ 200</b>                    | 1.3                                    | -1.5–4.0    | Reference | 0.8                                 | -1.9–3.6     | Reference |
| <b>201 – 1,000</b>              | -2.0                                   | -4.4–0.5    | 0.030     | -1.4                                | -4.0–1.2     | 0.114     |
| <b>1,001 – 4,000</b>            | -2.2                                   | -5.3–0.9    | 0.053     | -3.6                                | -6.9– -0.4   | 0.013     |
| <b>&gt; 4,000</b>               | -8.4                                   | -13.1– -3.8 | <0.001    | -11.5                               | -16.1 – -6.8 | <0.001    |

Adjusted for age, gender, body mass index, systolic blood pressure, diabetes, smoking, eGFR, and log albuminuria

**Supplemental Table 9**

C-statistics derived from multivariate adjusted logistic regression models of the eight variable kidney failure risk equation and urinary DKK3 in addition to the eight variable kidney failure risk equation in predicting >0 %, >5 % and >10 % decrease of eGFR in participants of the CARE FOR HOME study.

|                                          | <b>AUC<br/>Kidney<br/>failure risk<br/>equation</b> | <b>95 % CI</b> | <b>AUC<br/>Kidney<br/>failure risk<br/>equation<br/>+DKK3</b> | <b>95 % CI</b> | <b><i>P</i></b> |
|------------------------------------------|-----------------------------------------------------|----------------|---------------------------------------------------------------|----------------|-----------------|
| <b>&gt;0 %<br/>decrease<br/>of eGFR</b>  | 0.56                                                | 0.54-0.58      | 0.60                                                          | 0.58-0.63      | 0.098           |
| <b>&gt;2 %<br/>decrease<br/>of eGFR</b>  | 0.55                                                | 0.52-0.58      | 0.59                                                          | 0.56-0.62      | 0.015           |
| <b>&gt;5 %<br/>decrease<br/>of eGFR</b>  | 0.56                                                | 0.54-0.59      | 0.59                                                          | 0.56-0.61      | 0.015           |
| <b>&gt;10 %<br/>decrease<br/>of eGFR</b> | 0.61                                                | 0.59-0.64      | 0.63                                                          | 0.61-0.66      | 0.023           |

**Supplemental Table 10**

Estimated marginal means of annual change of estimated glomerular filtration rate (eGFR) according to suPAR plasma concentrations in participants of the CARE FOR HOME cohort.

| <b>Plasma suPAR<br/>(pg/mL)</b> | <b>Annual<br/>change of<br/>eGFR<br/>(%)</b> | <b>95 % CI</b> | <b><i>P</i></b> |
|---------------------------------|----------------------------------------------|----------------|-----------------|
| <b>Crude</b>                    |                                              |                |                 |
| <b>≤ 3,040</b>                  | -2.78                                        | -5.69–0.13     | Ref.            |
| <b>&gt; 3,040</b>               | -2.78                                        | -5.28–0.27     | 0.998           |
| <b>Model 1</b>                  |                                              |                |                 |
| <b>≤ 3,040</b>                  | -3.70                                        | -7.67–0.27     | Ref.            |
| <b>&gt; 3,040</b>               | -3.25                                        | -6.67–0.16     | 0.817           |
| <b>Model 2</b>                  |                                              |                |                 |
| <b>≤ 3,040</b>                  | -2.58                                        | -6.67–1.51     | Ref.            |
| <b>&gt; 3,040</b>               | -3.70                                        | -7.12–0.28     | 0.587           |
| <b>Model 3</b>                  |                                              |                |                 |
| <b>≤ 3,040</b>                  | -2.51                                        | -6.50–1.48     | Ref.            |
| <b>&gt; 3,040</b>               | -2.38                                        | -5.77–1.01     | 0.949           |

Model 1: adjusted for age, gender, body mass index, systolic blood pressure, diabetes and smoking

Model 2: Model 1 + adjusted for eGFR

Model 3: Model 2 + adjusted for log albuminuria

**Supplemental Table 11**

Integrated discrimination improvement (IDI) and Net reclassification improvement by suPAR compared to urinary DKK3/creatinine in predicting >0 %, >5 % and >10 % decrease of estimated glomerular filtration rate (eGFR) in participants of the CARE FOR HOME study.

|                                 | <b>IDI</b> | <b>95 % CI</b> | <b><i>P</i></b> | <b>NRI</b> | <b>95 % CI</b> | <b><i>P</i></b> |
|---------------------------------|------------|----------------|-----------------|------------|----------------|-----------------|
| <b>&gt;0 % decrease of eGFR</b> | 0.012      | 0.009 – 0.015  | 0.227           | 0.033      | 0.028 – 0.095  | 0.301           |
| <b>&gt;2 % decrease of eGFR</b> | 0.003      | 0.001 – 0.006  | 0.140           | 0.019      | 0.052 – 0.089  | 0.598           |
| <b>&gt;5 % decrease of eGFR</b> | 0.006      | 0,001 – 0.030  | 0.624           | 0.067      | 0.051 – 0.185  | 0.257           |

**Supplemental Table 12**

Baseline characteristics of participants of the kidney biopsies study divided into categories of DKK3/creatinine.

|                                    | <b>All participants<br/>(N=76)</b> | <b>DKK3/creatinine<br/>≤200 pg/mg<br/>(N=18)</b> | <b>DKK3/creatinine<br/>1,001-4,000 pg/mg<br/>(N=20)</b> | <b>DKK3/creatinine<br/>&gt;4,000 pg/mg<br/>(N=38)</b> | <b><i>P</i></b> |
|------------------------------------|------------------------------------|--------------------------------------------------|---------------------------------------------------------|-------------------------------------------------------|-----------------|
| Age (years)                        | 54.0±18.5                          | 51.2±19.7                                        | 47.8±18.8                                               | 61.0±14.5                                             | 0.070           |
| Gender (% male)                    | 71.1                               | 72.2                                             | 70.0                                                    | 71.1                                                  | 0.989           |
| Diabetes (%)                       | 11.8                               | 11.1                                             | 5.0                                                     | 15.8                                                  | 0.479           |
| Plasma creatinine (mg/dL)          | 2.9±1.8                            | 1.8±1.5                                          | 2.3±1.5                                                 | 3.6±1.7                                               | <0.001          |
| eGFR (ml/min/1.73 m <sup>2</sup> ) | 38±31                              | 58±34                                            | 48±38                                                   | 23±16                                                 | <0.001          |
| Urine DKK3/creatinine (pg/mg)      | 3,778 (11,273)                     | 642 (364)                                        | 2,806 (1,744)                                           | 13,234 (15,246)                                       | <0.001          |
| Log urine DKK3/creatinine (pg/mg)  | 8.3±1.4                            | 6.3±0.4                                          | 7.8±0.4                                                 | 9.5±0.9                                               | <0.001          |
| Albuminuria (mg/g)                 | 2,725 (4,481)                      | 2,826 (4,838)                                    | 1,521 (2,044)                                           | 4,079 (4,854)                                         | 0.072           |
| Log albuminuria (mg/g)             | 7.4±1.8                            | 7.0±2.0                                          | 6.8±1.8                                                 | 7.9±1.4                                               | 0.085           |
| Tubulointerstitial fibrosis (%)    | 50.7±20.6                          | 30.9±15.8                                        | 47.1±18.0                                               | 62.1±15.8                                             | <0.001          |

eGFR, estimated glomerular filtration rate

### Supplemental Table 13

Estimated marginal means of tubulointerstitial fibrosis according to urinary DKK3/creatinine.

| Urinary DKK3/creatinine (pg/mg) | Tubulo-interstitial fibrosis (%) | 95 % CI   | <i>P</i> |
|---------------------------------|----------------------------------|-----------|----------|
| <b>Crude</b>                    |                                  |           |          |
| ≤ 1,000                         | 20.8                             | 14.6–27.0 | Ref.     |
| 1,001-4,000                     | 35.0                             | 29.2–40.9 | 0.001    |
| > 4,000                         | 46.1                             | 41.8–50.3 | <0.001   |
| <b>Model 1</b>                  |                                  |           |          |
| ≤ 1,000                         | 19.9                             | 13.5–26.2 | Ref.     |
| 1,001-4,000                     | 34.2                             | 28.1–40.2 | 0.001    |
| > 4,000                         | 45.2                             | 40.6–49.7 | <0.001   |
| <b>Model 2</b>                  |                                  |           |          |
| ≤ 1,000                         | 23.4                             | 17.2–29.6 | Ref.     |
| 1,001-4,000                     | 35.7                             | 30.0–41.4 | 0.002    |
| > 4,000                         | 42.9                             | 38.4–47.3 | <0.001   |
| <b>Model 3</b>                  |                                  |           |          |
| ≤ 1,000                         | 22.2                             | 15.2–29.3 | Ref.     |
| 1,001-4,000                     | 36.2                             | 30.1–42.2 | 0.002    |
| > 4,000                         | 44.3                             | 39.1–49.5 | <0.001   |
| <b>Model 4</b>                  |                                  |           |          |
| ≤ 1,000                         | 20.6                             | 13.5–27.7 | Ref.     |
| 1,001-4,000                     | 35.2                             | 29.4–41.0 | 0.001    |
| > 4,000                         | 45.7                             | 40.9–50.5 | <0.001   |

Model 1: adjusted for age, gender

Model 2: Model 1 + adjusted for estimated glomerular filtration rate

Model 3: Model 2 + adjusted for albuminuria

Model 4: Model 3 + adjusted for cause of kidney disease

**Supplemental Table 14**

Baseline characteristics of participants of the STOP-IgAN trial divided into two groups at median of DKK3/creatinine levels in urine.

|                                                                    | <b>All participants<br/>(N=96)</b> | <b>DKK3/creatinine<br/>≤779 pg/mg<br/>(N=48)</b> | <b>DKK3/creatinine<br/>&gt;779 pg/mg<br/>(N=48)</b> | <b><i>P</i></b> |
|--------------------------------------------------------------------|------------------------------------|--------------------------------------------------|-----------------------------------------------------|-----------------|
| Age (years)                                                        | 43.6±12.7                          | 41.2±13.7                                        | 46.0±11.3                                           | 0.071           |
| Gender (% male)                                                    | 22.8                               | 11.8                                             | 34.0                                                | 0.009           |
| Body mass index (kg/m <sup>2</sup> )                               | 27.4±4.3                           | 27.9±4.3                                         | 27.0±4.2                                            | 0.545           |
| Systolic blood pressure (mmHg)                                     | 131±14                             | 132±17                                           | 130±11                                              | 0.394           |
| Smoking (%)                                                        | 41.6                               | 45.1                                             | 38.0                                                | 0.546           |
| ACE inhibitor therapy (%)                                          | 75.2                               | 82.3                                             | 68.0                                                | 0.111           |
| Angiotensin-receptor-blocker therapy (%)                           | 41.6                               | 47.1                                             | 36.0                                                | 0.314           |
| Aldosterone antagonist therapy (%)                                 | 1.0                                | 0                                                | 2.0                                                 | 0.495           |
| Statin therapy (%)                                                 | 57.4                               | 60.8                                             | 54.0                                                | 0.549           |
| Plasma creatinine (mg/dL)                                          | 1.5±0.5                            | 1.4±0.5                                          | 1.6±0.6                                             | 0.074           |
| Estimated glomerular filtration rate (ml/min/1.73 m <sup>2</sup> ) | 63±27                              | 70±27                                            | 56±26                                               | <0.001          |
| Albuminuria (mg/g creatinine)                                      | 1,214 (1161)                       | 930 (875)                                        | 1,424 (1291)                                        | 0.010           |
| Log albuminuria (mg/g creatinine)                                  | 7.0±0.7                            | 6.8±0.7                                          | 7.3±0.6                                             | 0.010           |
| Urine DKK3/creatinine (pg/mg)                                      | 781 (1,233)                        | 389 (398)                                        | 1,601 (1,236)                                       | <0.001          |
| Log urine DKK3/creatinine (pg/mg)                                  | 6.4±1.3                            | 5.5±1.1                                          | 7.4±0.6                                             | <0.001          |
| Total cholesterol (mg/dL)                                          | 216±49                             | 208±55                                           | 224±42                                              | 0.121           |

### Supplemental Table 15

Baseline characteristics of participants of the STOP-IgAN trial divided into two groups at DKK3/creatinine in urine of 1,000 pg/mg.

|                                                                             | <b>All participants<br/>(N=96)</b> | <b>DKK3/creatinine<br/>≤1,000 pg/mg<br/>(N=61)</b> | <b>DKK3/creatinine<br/>&gt;1,000 pg/mg<br/>(N=35)</b> | <b><i>P</i></b> |
|-----------------------------------------------------------------------------|------------------------------------|----------------------------------------------------|-------------------------------------------------------|-----------------|
| <b>Age (years)</b>                                                          | 43.6±12.7                          | 41.9±13.8                                          | 46.6±10.2                                             | 0.023           |
| <b>Gender (% male)</b>                                                      | 22.8                               | 17.2                                               | 32.4                                                  | 0.090           |
| <b>Body mass index (kg/m<sup>2</sup>)</b>                                   | 27.4±4.3                           | 27.4±4.3                                           | 27.4±4.3                                              | 0.910           |
| <b>Systolic blood pressure (mmHg)</b>                                       | 131±14                             | 131±16                                             | 130±11                                                | 0.090           |
| <b>Smoking (%)</b>                                                          | 41.6                               | 40.6                                               | 43.2                                                  | 0.836           |
| <b>ACE inhibitor therapy (%)</b>                                            | 75.2                               | 75.0                                               | 75.7                                                  | 0.999           |
| <b>Angiotensin-receptor-blocker therapy (%)</b>                             | 41.6                               | 50.0                                               | 27.0                                                  | 0.036           |
| <b>Aldosterone antagonist therapy (%)</b>                                   | 1.0                                | 1.6                                                | 0                                                     | 0.999           |
| <b>Statin therapy (%)</b>                                                   | 57.4                               | 56.3                                               | 59.5                                                  | 0.836           |
| <b>Plasma creatinine (mg/dL)</b>                                            | 1.5±0.5                            | 1.4±0.5                                            | 1.6±0.6                                               | 0.712           |
| <b>Estimated glomerular filtration rate<br/>(ml/min/1.73 m<sup>2</sup>)</b> | 63.3±27.5                          | 68.4±27.4                                          | 54.3±25.7                                             | 0.389           |
| <b>Albuminuria (mg/g creatinine)</b>                                        | 1,408±1,058                        | 1,125±707                                          | 1,900±1,361                                           | 0.086           |
| <b>Log albuminuria (mg/g creatinine)</b>                                    | 7.0±0.7                            | 6.8±0.7                                            | 7.4±0.7                                               | 0.571           |
| <b>Urine DKK3/creatinine (pg/mg)</b>                                        | 1,162±1,254                        | 465±295                                            | 2,376±1,362                                           | <0.001          |
| <b>Log urine DKK3/creatinine (pg/mg)</b>                                    | 6.4±1.3                            | 5.8±1.1                                            | 7.6±0.5                                               | 0.001           |
| <b>Total cholesterol (mg/dL)</b>                                            | 216±49                             | 209±52                                             | 227±41                                                | 0.180           |



**Supplemental Table 16**

Estimated marginal means of change of estimated glomerular filtration rate (eGFR) during the run-in phase in participants of the STOP-IgAN trial according to DKK3/creatinine in urine divided in two groups at median.

| <b>Urinary DKK3/creatinine<br/>(pg/mg)</b> | <b>Change of eGFR<br/>(%)</b> | <b>95 % CI</b> | <b><i>P</i></b> |
|--------------------------------------------|-------------------------------|----------------|-----------------|
| <b>Crude</b>                               |                               |                |                 |
| ≤779 pg/mg                                 | 0.0                           | -4.6 – 4.7     | Ref.            |
| >779 pg/mg                                 | -19.5                         | -23.9 – -15.0  | <0.001          |
| <b>Model 1</b>                             |                               |                |                 |
| ≤779 pg/mg                                 | -0.7                          | -6.2 – 4.8     | Ref.            |
| >779 pg/mg                                 | -19.7                         | -24.4 – -15.0  | <0.001          |
| <b>Model 2</b>                             |                               |                |                 |
| ≤779 pg/mg                                 | -0.9                          | -6.5 – 4.6     | Ref.            |
| >779 pg/mg                                 | -19.6                         | -24.3 – -14.9  | <0.001          |
| <b>Model 3</b>                             |                               |                |                 |
| ≤779 pg/mg                                 | -1.3                          | -7.0 – 4.4     | Ref.            |
| >779 pg/mg                                 | -19.1                         | -24.2 – -14.0  | <0.001          |

Model 1: adjusted for age, gender, body mass index, systolic blood pressure and smoking

Model 2: Model 1 + adjusted for eGFR

Model 3: Model 2 + adjusted for log albuminuria

**Supplemental Table 17**

Estimated marginal means of change of estimated glomerular filtration rate (eGFR) during the run-in phase in participants of the STOP-IgAN trial according to DKK3/creatinine in urine divided in two groups at 1,000 pg/mg.

| <b>Urinary DKK3/creatinine (pg/mg)</b> | <b>Change of eGFR (%)</b> | <b>95 % CI</b> | <b><i>P</i></b> |
|----------------------------------------|---------------------------|----------------|-----------------|
| <b>Crude</b>                           |                           |                |                 |
| ≤1,000 pg/mg                           | -3.4                      | -7.6–0.9       | Ref.            |
| >1,000 pg/mg                           | -21.4                     | -26.8– -15.9   | <0.001          |
| <b>Model 1</b>                         |                           |                |                 |
| ≤1,000 pg/mg                           | -4.6                      | -9.5–0.3       | Ref.            |
| >1,000 pg/mg                           | -21.4                     | -26.9– -15.8   | <0.001          |
| <b>Model 2</b>                         |                           |                |                 |
| ≤1,000 pg/mg                           | -4.8                      | -9.7–0.2       | Ref.            |
| >1,000 pg/mg                           | -21.2                     | -26.8– -15.5   | <0.001          |
| <b>Model 3</b>                         |                           |                |                 |
| ≤1,000 pg/mg                           | -4.5                      | -9.5–0.6       | Ref.            |
| >1,000 pg/mg                           | -21.8                     | -28.0– -15.7   | <0.001          |

Model 1: adjusted for age, gender, body mass index, systolic blood pressure and smoking

Model 2: Model 1 + adjusted for eGFR

Model 3: Model 2 + adjusted for log albuminuria

**Supplemental Table 18**

Integrated discrimination improvement (IDI), Net reclassification improvement (NRI) and c-statistics by urinary DKK3/creatinine compared to age, sex, body mass index, systolic blood pressure, estimated glomerular filtration rate (eGFR) and albuminuria (ACR) (model 1) in predicting >0 % and >5 % decrease of eGFR in participants of the STOP-IgAN trial during the run-in phase.

|                                 | <b>IDI</b> | <b>95 % CI</b> | <b>P</b> | <b>NRI</b> | <b>95 % CI</b> | <b>P</b> |
|---------------------------------|------------|----------------|----------|------------|----------------|----------|
| <b>&gt;0 % decrease of eGFR</b> | 0.135      | 0.070 – 0.200  | <0.001   | 0.450      | 0.134 – 0.766  | 0.005    |
| <b>&gt;5 % decrease of eGFR</b> | 0.165      | 0.087 – 0.243  | <0.001   | 0.294      | 0.072 – 0.516  | 0.009    |

|                                 | <b>AUC Model 1</b> | <b>95 % CI</b> | <b>AUC Model 1 + DKK3/creatinine</b> | <b>95 % CI</b> | <b>P</b> |
|---------------------------------|--------------------|----------------|--------------------------------------|----------------|----------|
| <b>&gt;0 % decrease of eGFR</b> | 0.62               | 0.48-0.75      | 0.79                                 | 0.67-0.90      | 0.016    |
| <b>&gt;5 % decrease of eGFR</b> | 0.68               | 0.57-0.80      | 0.81                                 | 0.71-0.91      | 0.005    |

### Supplemental Table 19

Association between change of DKK3/creatinine in urine and change of estimated glomerular filtration rate (eGFR in %) during the treatment phase in participants of the STOP-IgAN trial.

|                                          | <b>Regression coefficient B</b> | <b>95 % CI</b>   | <b>P</b> |
|------------------------------------------|---------------------------------|------------------|----------|
| <b>Crude</b>                             |                                 |                  |          |
| <b>Delta DKK3/creatinine (pg/mg)</b>     | -0.008                          | -0.011 – -0.005  | <0.001   |
| <b>Model 1</b>                           |                                 |                  |          |
| <b>Delta DKK3/creatinine (pg/mg)</b>     | -0.008                          | -0.011 – -0.005  | <0.001   |
| <b>Treatment</b>                         | -2.553                          | -15.457 – 10.352 | 0.698    |
| <b>Model 2</b>                           |                                 |                  |          |
| <b>Delta DKK3/creatinine (pg/mg)</b>     | -0.013                          | -0.021 – -0.004  | 0.003    |
| <b>Treatment</b>                         | -1.539                          | -14.379 – 11.300 | 0.814    |
| <b>Interaction term</b>                  | 0.006                           | -0.003 – 0.015   | 0.219    |
| <b>Model 3</b>                           |                                 |                  |          |
| <b>Delta DKK3/creatinine (pg/mg)</b>     | -0.013                          | -0.022 – -0.004  | 0.004    |
| <b>Treatment</b>                         | -1.254                          | -14.364 – 11.855 | 0.851    |
| <b>Interaction term</b>                  | 0.006                           | -0.003 – 0.016   | 0.204    |
| <b>Model 4</b>                           |                                 |                  |          |
| <b>Delta DKK3/creatinine (pg/mg)</b>     | -0.013                          | -0.022 – -0.004  | 0.004    |
| <b>Treatment</b>                         | -1.584                          | -14.674 – 11.505 | 0.812    |
| <b>Interaction term</b>                  | 0.006                           | -0.004 – 0.015   | 0.224    |
| <b>eGFR (ml/min/1.73m<sup>2</sup>)</b>   | 0.103                           | -0.190 – 0.395   | 0.492    |
| <b>Model 5</b>                           |                                 |                  |          |
| <b>Delta DKK3/creatinine (pg/mg)</b>     | -0.013                          | -0.023 – -0.002  | 0.016    |
| <b>Treatment</b>                         | 0.224                           | -13.246 – 13.694 | 0.974    |
| <b>Interaction term</b>                  | 0.006                           | -0.005 – 0.017   | 0.278    |
| <b>eGFR (ml/min/1.73m<sup>2</sup>)</b>   | 0.055                           | -0.253 – 0.364   | 0.726    |
| <b>Log albuminuria (mg/g creatinine)</b> | -6.939                          | -18.142 – 4.264  | 0.225    |

Model 1: adjusted for treatment (supportive care alone or supportive care plus immunosuppressive therapy)

Model 2: Model 1 + interaction term of delta DKK3/creatinine and treatment

Model 3: Model 2 + age, gender, body mass index, systolic blood pressure and smoking

Model 4: Model 3 + adjusted for eGFR

Model 5: Model 4 + adjusted for log albuminuria

**Supplemental Figure legends**

**Supplemental Figure 1**

Annual change of estimated glomerular filtration rate (eGFR) according to categories of DKK3/creatinine in CKD patients from the CARE FOR HOME study divided into patients with tubulointerstitial diseases, glomerular diseases, diabetic nephropathy or vascular nephropathy. Analyses were adjusted for age, gender, body mass index, systolic blood pressure, diabetes, smoking status, eGFR and log albuminuria.

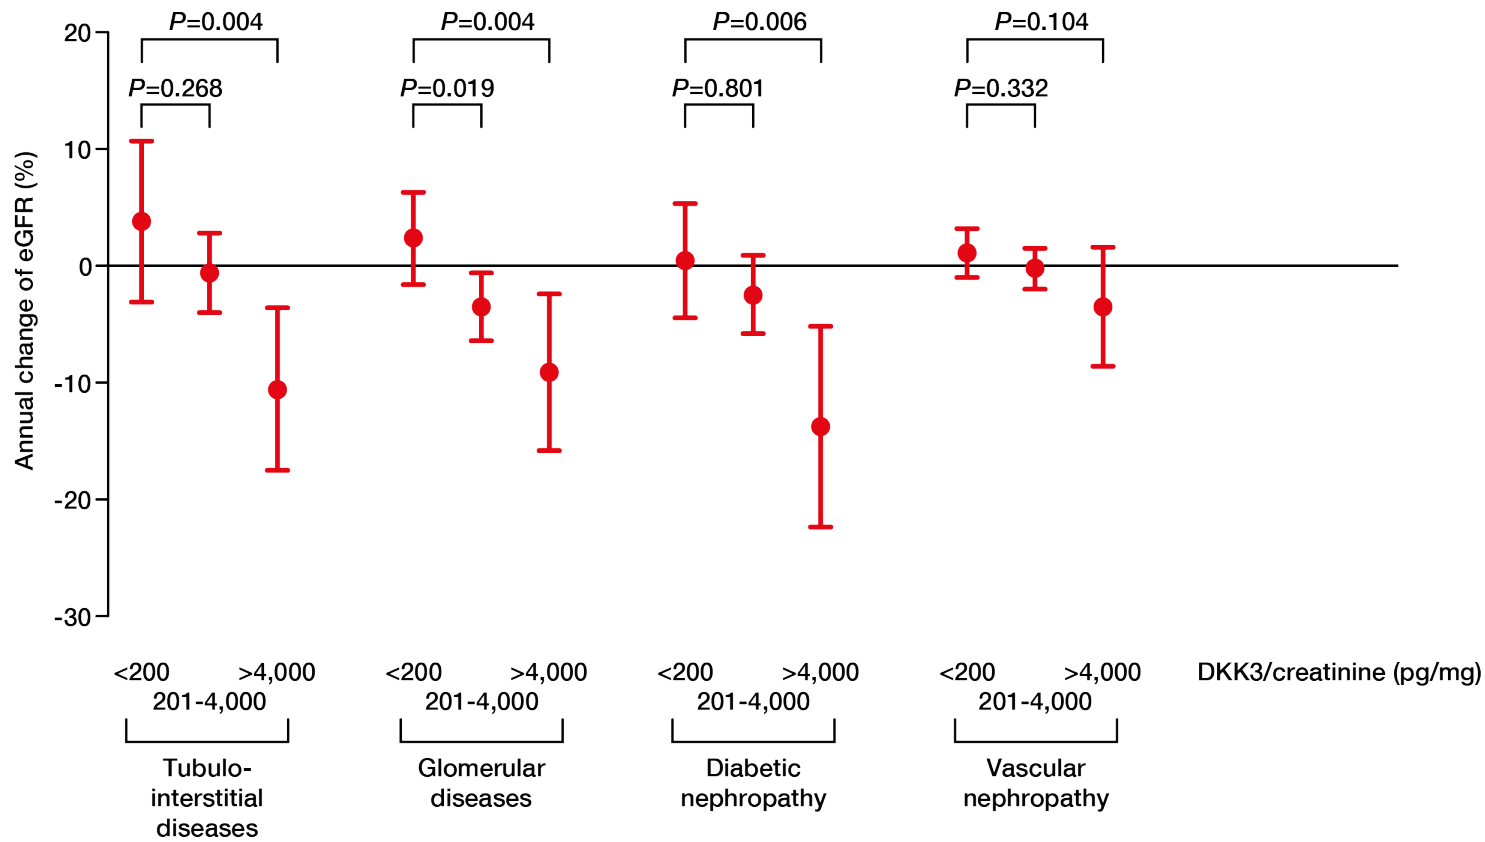

### Supplemental Figure 2

Tubulointerstitial fibrosis in kidney biopsy specimens of participants of the STOP-IgAN trial according to DKK3/creatinine in urine.

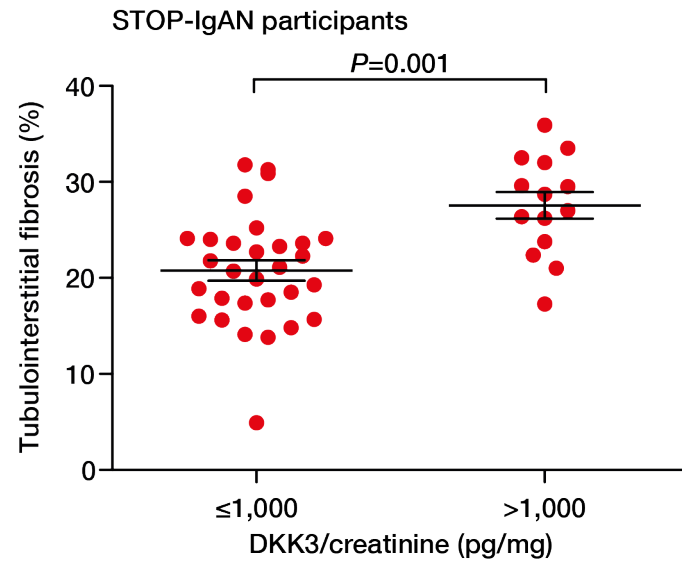

**Supplemental Figure 3**

Change of DKK3 during early treatment phase in participants of the STOP-IgAN trial according to randomization to supportive care or supportive care plus immunosuppressive therapy.

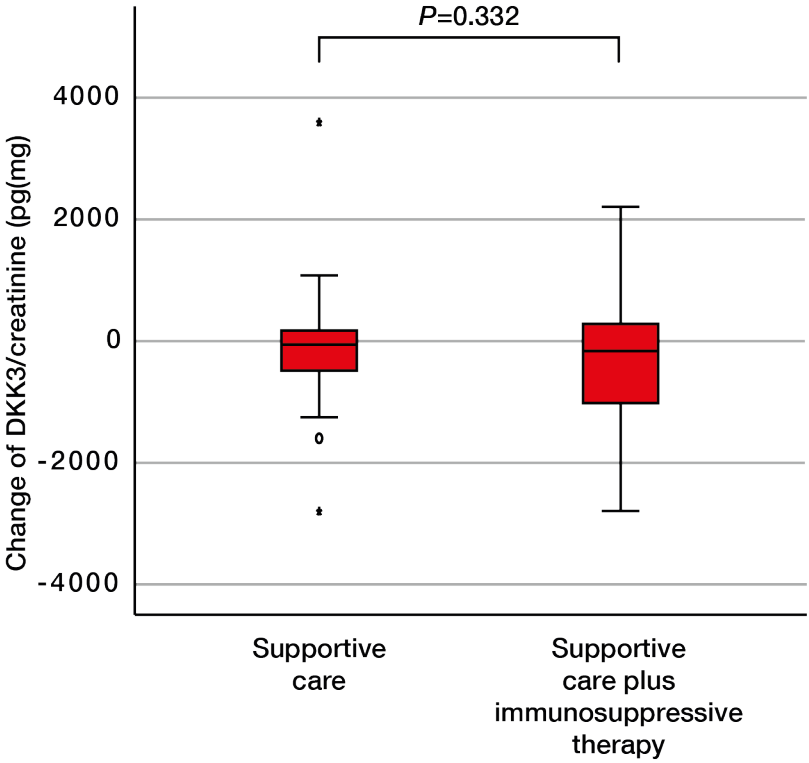

Supplement: ASN.2018040405SupplementaryData1.pdf [file ASN.2018040405SupplementaryData1.pdf]
